# Supplementary material for: Dynamics of cooperative excavation in ant and robot collectives
Source: eLife journal article supplement (doi:10.7554/elife.79638), 2022-10-10
Supplement: supp [file elife-79638-supp-v1.zip]

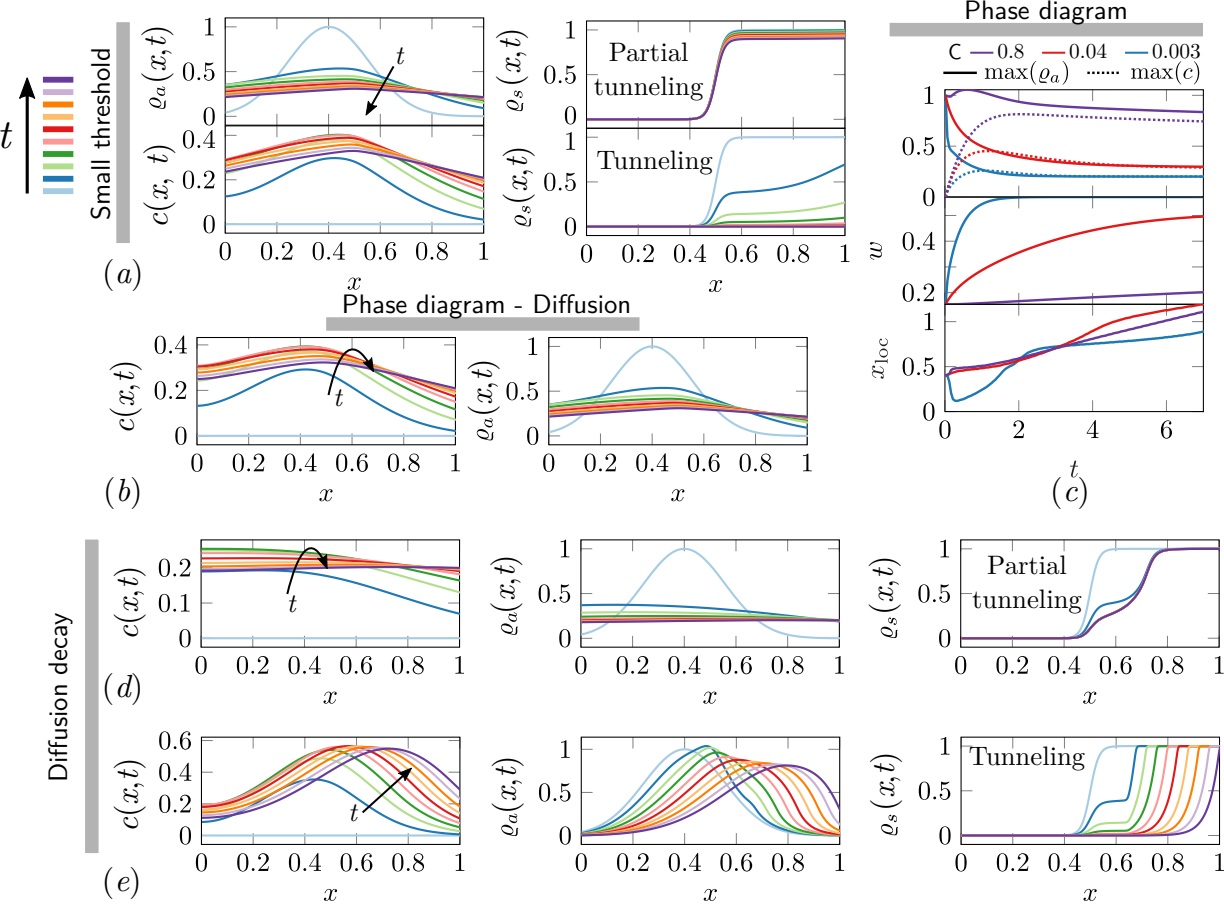

|                 | Phase                | $v_o$ | $\chi$             | $D_a$              | $k_+$ | $k_-$ | $D_c$              | $k_s$ |
|-----------------|----------------------|-------|--------------------|--------------------|-------|-------|--------------------|-------|
| Small threshold | Tunneling            | 0.1   | 0                  | 0.1                | -     | -     | -                  | 2.5   |
|                 | Partial-tunneling    | 0.1   | 0                  | 0.1                | -     | -     | -                  | 0.03  |
| Phase diagram   | Tunneling            | 0.1   | $5 \times 10^{-3}$ | $5 \times 10^{-3}$ | 1.5   | 1.5   | $5 \times 10^{-3}$ | 2.5   |
|                 | Partial-tunneling    | 0.1   | $5 \times 10^{-3}$ | $5 \times 10^{-1}$ | 1.5   | 1.5   | $5 \times 10^{-3}$ | 2.5   |
|                 | Partial-tunneling II | 0.1   | $5 \times 10^{-3}$ | $5 \times 10^{-2}$ | 1.5   | 1.5   | $5 \times 10^{-3}$ | 2.5   |
|                 | Diffusion            | 0.1   | $5 \times 10^{-3}$ | 0.1                | 1.5   | 1.5   | $5 \times 10^{-3}$ | 0.001 |
| Diffusion decay | Tunneling            | 0.1   | $5 \times 10^{-3}$ | $5 \times 10^{-3}$ | 1.5   | 1.5   | $5 \times 10^{-2}$ | 2.5   |
|                 | Partial-tunneling    | 0.1   | $5 \times 10^{-3}$ | $5 \times 10^{-1}$ | 1.5   | 1.5   | $5 \times 10^{-2}$ | 2.5   |
| (f) 2D          | Tunneling            | 0.1   | $5 \times 10^{-3}$ | $5 \times 10^{-3}$ | 1.5   | 1.5   | $5 \times 10^{-3}$ | 1.0   |
