# Supplementary material for: Dynamics of cooperative excavation in ant and robot collectives
Source: eLife journal article supplement (doi:10.7554/elife.79638), 2022-10-10
Supplement: supp [file elife-79638-supp-v1.zip]

---

**Algorithm 1:** RAnt behavioral algorithm

---

**Result:** Cooperative escape in Robot Ants

$d = 1$ ;

$C \in [0, 1]$ ;

$c^* = 0.5 \times c_{\max} \times C$ ;

**while** *true* **do**

    set heading;

**if** *object detected* &  $d = 1$  **then**

**if**  $c > c^*$  **then**

            engage magnet with probability  $E$ ;

            fetch object;

$d = -1$ ;

**else**

            turn away from object;

**end**

**end**

**if** *no object detected* **then**

$d = 1$ ;

        disengage magnet;

**end**

**if**  $d = -1$  and  $P < kC$  **then**

        disengage magnet;

        turn away from object;

$d = 1$ ;

**end**

**end**

---
