# Supplementary figures and images for: Dynamics of cooperative excavation in ant and robot collectives
Source: eLife journal article supplement (doi:10.7554/elife.79638), 2022-10-10

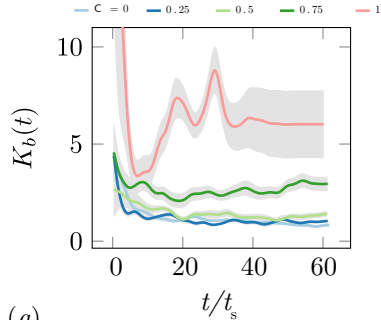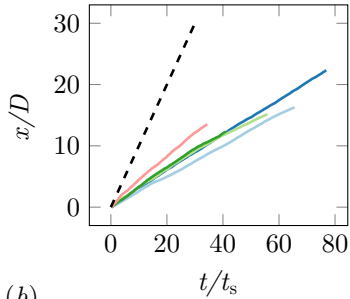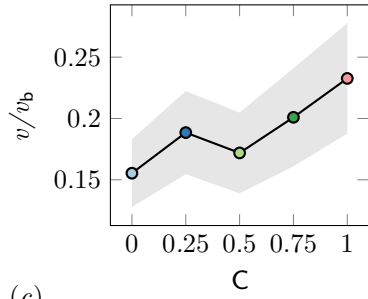

Supplement: supp [file elife-79638-supp-v1.zip]
